# Supplementary material
Source: MDPI journal article supplement (https://www.mdpi.com/2254-9625/11/1/8)
Supplement: s1 [file s1]

**General sections “A” and “B” of the questionnaire for the evaluation of the occupational risks perception of Italian and immigrant construction workers (NB: available in Italian language only)**

**QUESTIONARIO SULLA PERCEZIONE DEL RISCHIO**

**CODICE PROVINCIA:** \_\_\_\_\_ **Codice SOGGETTO:** \_\_\_\_\_ **Data:** \_\_\_\_\_

Dimensione azienda

- 1) lavoratore autonomo
- 2) fino a 3 addetti
- 3) da 4 a 6 addetti
- 4) da 7 a 10 addetti
- 5) da 11 a 30 addetti
- 6) più di 30 addetti
- 7) non ho contratto
- 8) ancora non lavoro

**(pag. 1-2 in 4 lingue: italiano, inglese, francese, arabo)**

***Descrivi QUALI COSE FAI DURANTE LA TUA GIORNATA DI LAVORO***

*(es. costruzione muratura, tagliole, assistenza, carico e scarico tubi e giunti dei ponteggi, ecc., oppure anche altri lavori come es. verniciatore, meccanico, autista)*

---

---

---

**Sezione A, Inquadramento**

1) Qual è il tuo paese di origine?

2) Da quanti anni sei in Italia?

- 1) Meno di 1
- 2) 1-3
- 3) 4-5
- 4) 6-10
- 5) Più di 10
- 6) Solo per italiani: da sempre

3) Qual è la tua qualifica professionale del lavoro che stai facendo adesso o che hai fatto in passato?

- 1) Capocantiere
- 2) Caposquadra
- 3) Operaio generico
- 4) Operaio specializzato
- 5) Attualmente sono senza lavoro
- 6) Altro(specificare)
- .....

4) Quanti anni hai?

\_\_\_\_\_ (anni già compiuti)

5) Il tuo rapporto di lavoro è:

- 1) Adesso sono senza contratto
- 2) Ho un posto fisso
- 3) Lavoro per poco tempo (es. 3/6 mesi)
- 4) Come artigiano
- 5) Altro .....

|                                                                            |                                                                                                                                                                                                                                                                                                        |
|----------------------------------------------------------------------------|--------------------------------------------------------------------------------------------------------------------------------------------------------------------------------------------------------------------------------------------------------------------------------------------------------|
| 6) Che scuole hai fatto?                                                   | 1) Nessuna<br>2) Primarie<br>3) Superiori<br>4) Università                                                                                                                                                                                                                                             |
| 7) Da quanti anni lavori nell'edilizia?                                    | 1) Non ho mai lavorato in edilizia<br>2) Meno di 1<br>3) 1-3<br>4) 4-5<br>5) 6-10<br>6) Più di 10                                                                                                                                                                                                      |
| 8) Che lavoro fai di più?<br><b><u>Scrivere una sola risposta</u></b>      | 1) Muratore<br>2) Carpentiere<br>3) Pavimentatore<br>4) Idraulico-elettricista<br>5) Lattoniere<br>6) Intonacatore<br>7) Montatore ponteggi<br>8) Ferraiolo<br>9) Gruista<br>10) Movimento terra<br>11) Rimozione amianto<br>12) Jolly<br>13) Stradino-asfaltatore<br>14) Altro<br>(specificare) _____ |
| 9) Hai frequentato almeno un corso di formazione in aula sulla sicurezza ? | SI NO                                                                                                                                                                                                                                                                                                  |
| 10) Se sì, quante ore di corso in aula hai fatto?                          | 1) Meno di 8<br>2) Tra 8 e 16<br>3) Tra 16 e 24<br>4) Più di 24                                                                                                                                                                                                                                        |

**Solo per gli stranieri**

|                                                                                   |    |    |
|-----------------------------------------------------------------------------------|----|----|
| 11) Capisci l'italiano?                                                           | SI | NO |
| 12) Riesci a leggere in italiano?                                                 | SI | NO |
| 13) Riesci a parlare in italiano?                                                 | SI | NO |
| 14) Riesci a scrivere in italiano?                                                | SI | NO |
| 15) Quando lavori parli in italiano con i tuoi compagni di lavoro?                | SI | NO |
| 16) Quando lavori parli nella tua lingua d'origine con i tuoi compagni di lavoro? | SI | NO |

**NB) Se riesci a leggere e a scrivere in italiano continua la compilazione del questionario altrimenti fermati**

## Sezione B, Dati generali

|                                                                                                                                  |    |    |
|----------------------------------------------------------------------------------------------------------------------------------|----|----|
| 17) Ho avuto almeno un incidente sul lavoro in Italia                                                                            | SI | NO |
| 18) Ho avuto almeno un incidente sul lavoro all'estero                                                                           | SI | NO |
| 19) Almeno una volta ho visto un mio compagno farsi molto male sul lavoro                                                        | SI | NO |
| 20) Se hai risposto SI alla domanda di prima (19), Dopo averlo visto ho cambiato il mio modo di lavorare per paura di farmi male | SI | NO |
| 21) Il mezzo di trasporto che utilizzo di più per raggiungere il posto di lavoro è:                                              |    |    |
| <u>Scrivere una sola risposta</u>                                                                                                |    |    |
| 1) bicicletta                                                                                                                    |    |    |
| 2) moto                                                                                                                          |    |    |
| 3) automobile                                                                                                                    |    |    |
| 4) mezzo pubblico (es. autobus/treno)                                                                                            |    |    |
| 5) mezzo aziendale (es. furgone)                                                                                                 |    |    |
| 22) A volte quando rientro dal lavoro alla sera sono stanco e faccio più fatica a guidare.                                       | SI | NO |
| 23) Ho avuto almeno un incidente mentre andavo o tornavo da lavorare                                                             | SI | NO |
| 24) Quando lavoro su un tetto, mi sento più sicuro se:                                                                           |    |    |
| 1) c'è un ponteggio di protezione contro le cadute                                                                               |    |    |
| 2) uso solo i dispositivi di protezione come cinture di sicurezza o altro                                                        |    |    |
| 25) Ho avuto abbastanza informazioni sui rischi di infortunio del mio lavoro                                                     | SI | NO |
| 26) Ho avuto abbastanza informazioni su cosa devo fare per non farmi male durante il lavoro                                      | SI | NO |
| 27) Le informazioni sulla sicurezza me le dà a voce il mio padrone                                                               | SI | NO |
| 28) Le informazioni sulla sicurezza me le dà a voce il mio capocantiere/caposquadra                                              | SI | NO |
| 29) Le informazioni sulla sicurezza me le danno con dei fogli scritti                                                            | SI | NO |
| 30) Le informazioni sulla sicurezza me le danno con una lezione in aula                                                          | SI | NO |
| 31) Il modo in cui preferisco avere informazioni sulla sicurezza e salute del lavoro è:                                          |    |    |
| <u>(Scrivere solo una risposta)</u>                                                                                              |    |    |
| 1) a voce dal capo                                                                                                               |    |    |
| 2) dal medico                                                                                                                    |    |    |
| 3) con un testo scritto                                                                                                          |    |    |
| 4) con una lezione                                                                                                               |    |    |
| 5) con dimostrazioni pratiche                                                                                                    |    |    |
